# Supplementary material
Source: PubMed Central journal article supplement (PMC4668938)
Supplement: NIHMS740880-supplement-01.pdf [file NIHMS740880-supplement-01.pdf]

25. E. V. Acosta-Rodriguez *et al.*, Surface phenotype and antigenic specificity of human interleukin 17-producing T helper memory cells. *Nat Immunol* **8**, 639-646 (2007).
26. B. Boisson *et al.*, An ACT1 mutation selectively abolishes interleukin-17 responses in humans with chronic mucocutaneous candidiasis. *Immunity* **39**, 676-686 (2013).
27. J. Feinberg *et al.*, Bacillus Calmette Guerin triggers the IL-12/IFN-gamma axis by an IRAK-4- and NEMO-dependent, non-cognate interaction between monocytes, NK, and T lymphocytes. *Eur J Immunol* **34**, 3276-3284 (2004).
28. M. Ouederni *et al.*, Major histocompatibility complex class II expression deficiency caused by a RFXANK founder mutation: a survey of 35 patients. *Blood* **118**, 5108-5118 (2011).
29. O. de la Calle-Martin *et al.*, Familial CD8 deficiency due to a mutation in the CD8 alpha gene. *J Clin Invest* **108**, 117-123 (2001).
30. B. Pasquier *et al.*, Defective NKT cell development in mice and humans lacking the adapter SAP, the X-linked lymphoproliferative syndrome gene product. *J Exp Med* **201**, 695-701 (2005).
31. E. Martin *et al.*, CTP synthase 1 deficiency in humans reveals its central role in lymphocyte proliferation. *Nature* **510**, 288-292 (2014).
32. A. C. Chan *et al.*, ZAP-70 deficiency in an autosomal recessive form of severe combined immunodeficiency. *Science* **264**, 1599-1601 (1994).
33. N. V. Morgan *et al.*, Mutation in the TCRalpha subunit constant gene (TRAC) leads to a human immunodeficiency disorder characterized by a lack of TCRalphabeta+ T cells. *J Clin Invest* **121**, 695-702 (2011).
34. L. Le Bourhis *et al.*, Antimicrobial activity of mucosal-associated invariant T cells. *Nat Immunol* **11**, 701-708 (2010).
35. H. R. Conti *et al.*, Th17 cells and IL-17 receptor signaling are essential for mucosal host defense against oral candidiasis. *J Exp Med* **206**, 299-311 (2009).
36. L. Liu *et al.*, Gain-of-function human STAT1 mutations impair IL-17 immunity and underlie chronic mucocutaneous candidiasis. *J Exp Med* **208**, 1635-1648 (2011).
37. Material and methods are available as supplementary materials on Science online.
38. A. V. Grant *et al.*, Accounting for genetic heterogeneity in homozygosity mapping: application to Mendelian susceptibility to mycobacterial disease. *J Med Genet* **48**, 567 (Aug, 2011).
39. S. Purcell *et al.*, PLINK: a tool set for whole-genome association and population-based linkage analyses. *Am J Hum Genet* **81**, 559 (Sep, 2007).
40. G. R. Abecasis, S. S. Cherny, W. O. Cookson, L. R. Cardon, Merlin--rapid analysis of dense genetic maps using sparse gene flow trees. *Nat Genet* **30**, 97 (Jan, 2002).
41. M. Byun *et al.*, Whole-exome sequencing-based discovery of STIM1 deficiency in a child with fatal classic Kaposi sarcoma. *J Exp Med* **207**, 2307 (Oct 25, 2010).
42. H. Li, R. Durbin, Fast and accurate short read alignment with Burrows-Wheeler transform. *Bioinformatics* **25**, 1754 (Jul 15, 2009).
43. A. McKenna *et al.*, The Genome Analysis Toolkit: a MapReduce framework for analyzing next-generation DNA sequencing data. *Genome Res* **20**, 1297 (Sep, 2010).
44. H. Li *et al.*, The Sequence Alignment/Map format and SAMtools. *Bioinformatics* **25**, 2078 (Aug 15, 2009).
45. K. Wang, M. Li, H. Hakonarson, ANNOVAR: functional annotation of genetic variants from high-throughput sequencing data. *Nucleic Acids Res* **38**, e164 (Sep, 2010).
46. S. Dupuis *et al.*, Impaired response to interferon-alpha/beta and lethal viral disease in human STAT1 deficiency. *Nat Genet* **33**, 388 (Mar, 2003).
47. M. Tsumura *et al.*, Dominant-negative STAT1 SH2 domain mutations in unrelated patients with Mendelian susceptibility to mycobacterial disease. *Hum Mutat* **33**, 1377 (Sep, 2012).
48. K. Ichiyama *et al.*, Foxp3 inhibits RORgammat-mediated IL-17A mRNA transcription through direct interaction with RORgammat. *J Biol Chem* **283**, 17003 (Jun 20, 2008).
49. T. Rauen, Y. T. Juang, C. M. Hedrich, K. Kis-Toth, G. C. Tsokos, A novel isoform of the orphan receptor RORgammat suppresses IL-17 production in human T cells. *Genes Immun* **13**, 346 (Jun, 2012).
50. H. S. Robins *et al.*, Comprehensive assessment of T-cell receptor beta-chain diversity in alphabeta T cells. *Blood* **114**, 4099 (Nov 5, 2009).
51. A. M. Sherwood *et al.*, Deep sequencing of the human TCRgamma and TCRbeta repertoires suggests that TCRbeta rearranges after alphabeta and gammadelta T cell commitment. *Sci Transl Med* **3**, 90ra61 (Jul 6, 2011).
52. H. Robins *et al.*, Ultra-sensitive detection of rare T cell clones. *J Immunol Methods* **375**, 14 (Jan 31, 2012).

54. C. S. Carlson *et al.*, Using synthetic templates to design an unbiased multiplex PCR assay. *Nat Commun* **4**, 2680 (2013).
54. C. S. Ma *et al.*, Functional STAT3 deficiency compromises the generation of human T follicular helper cells. *Blood* **119**, 3997 (Apr 26, 2012).
55. B. Biesinger *et al.*, Stable growth transformation of human T lymphocytes by herpesvirus saimiri. *Proc Natl Acad Sci U S A* **89**, 3116 (Apr 1, 1992).
56. L. Ruggieri *et al.*, Cell-surface marking of CD(34+)-restricted phenotypes of human hematopoietic progenitor cells by retrovirus-mediated gene transfer. *Hum Gene Ther* **8**, 1611 (Sep 1, 1997).
57. E. van de Vosse *et al.*, Antisense-mediated exon skipping to correct IL-12Rbeta1 deficiency in T cells. *Blood* **113**, 4548 (May 7, 2009).
58. R. Geiger, T. Duhon, A. Lanzavecchia, F. Sallusto, Human naive and memory CD4+ T cell repertoires specific for naturally processed antigens analyzed using libraries of amplified T cells. *J Exp Med* **206**, 1525 (Jul 6, 2009).
59. A. Roberts, A. Cooper, J. Belisle, J. Turner, M. Gonzalez-Juarerro, and I. Orme, *Murine models of tuberculosis*. In: D. K. S. Kaufmann, Ed., *Methods in Microbiology* (Academic Press, London, 2002).
60. L. Kjer-Nielsen *et al.*, MR1 presents microbial vitamin B metabolites to MAIT cells. *Nature* **491**, 717 (Nov 29, 2012).
61. A. J. Corbett *et al.*, T-cell activation by transitory neo-antigens derived from distinct microbial pathways. *Nature* **509**, 361 (May 15, 2014).
62. R. Reantragoon *et al.*, Antigen-loaded MR1 tetramers define T cell receptor heterogeneity in mucosal-associated invariant T cells. *J Exp Med* **210**, 2305 (Oct 21, 2013).
63. M. O. Chandesris *et al.*, Autosomal dominant STAT3 deficiency and hyper-IgE syndrome: molecular, cellular, and clinical features from a French national survey. *Medicine (Baltimore)* **91**, e1 (Jul, 2012).
64. S. Rigaud *et al.*, XIAP deficiency in humans causes an X-linked lymphoproliferative syndrome. *Nature* **444**, 110 (Nov 2, 2006).
65. A. J. Coffey *et al.*, Host response to EBV infection in X-linked lymphoproliferative disease results from mutations in an SH2-domain encoding gene. *Nat Genet* **20**, 129 (Oct, 1998).
66. F. Sallusto, D. Lenig, C. R. Mackay, A. Lanzavecchia, Flexible programs of chemokine receptor expression on human polarized T helper 1 and 2 lymphocytes. *J Exp Med* **187**, 875 (Mar 16, 1998).
67. S. Kurebayashi *et al.*, Retinoid-related orphan receptor gamma (RORgamma) is essential for lymphoid organogenesis and controls apoptosis during thymopoiesis. *Proc Natl Acad Sci U S A* **97**, 10132 (Aug 29, 2000).
